# Supplementary material for: Time-Restricted PiggyBac DNA Transposition by Transposase Protein Delivery Using Lentivirus-Derived Nanoparticles
Source: PubMed Central journal article supplement — Mol Ther Nucleic Acids. 2018 Mar 30;11:253–62. doi: 10.1016/j.omtn.2018.02.006 (PMC5992343; doi:10.1016/j.omtn.2018.02.006), 2018-03-30
Supplement: mmc1.pdf [file mmc1.pdf]

**OMTN, Volume 11**

**Supplemental Information**

**Time-Restricted PiggyBac DNA Transposition  
by Transposase Protein Delivery Using  
Lentivirus-Derived Nanoparticles**

**Kristian Alsbjerg Skipper, Mathias Gaarde Nielsen, Sofie Andersen, Laura Barrett  
Ryø, Rasmus O. Bak, and Jacob Giehm Mikkelsen**

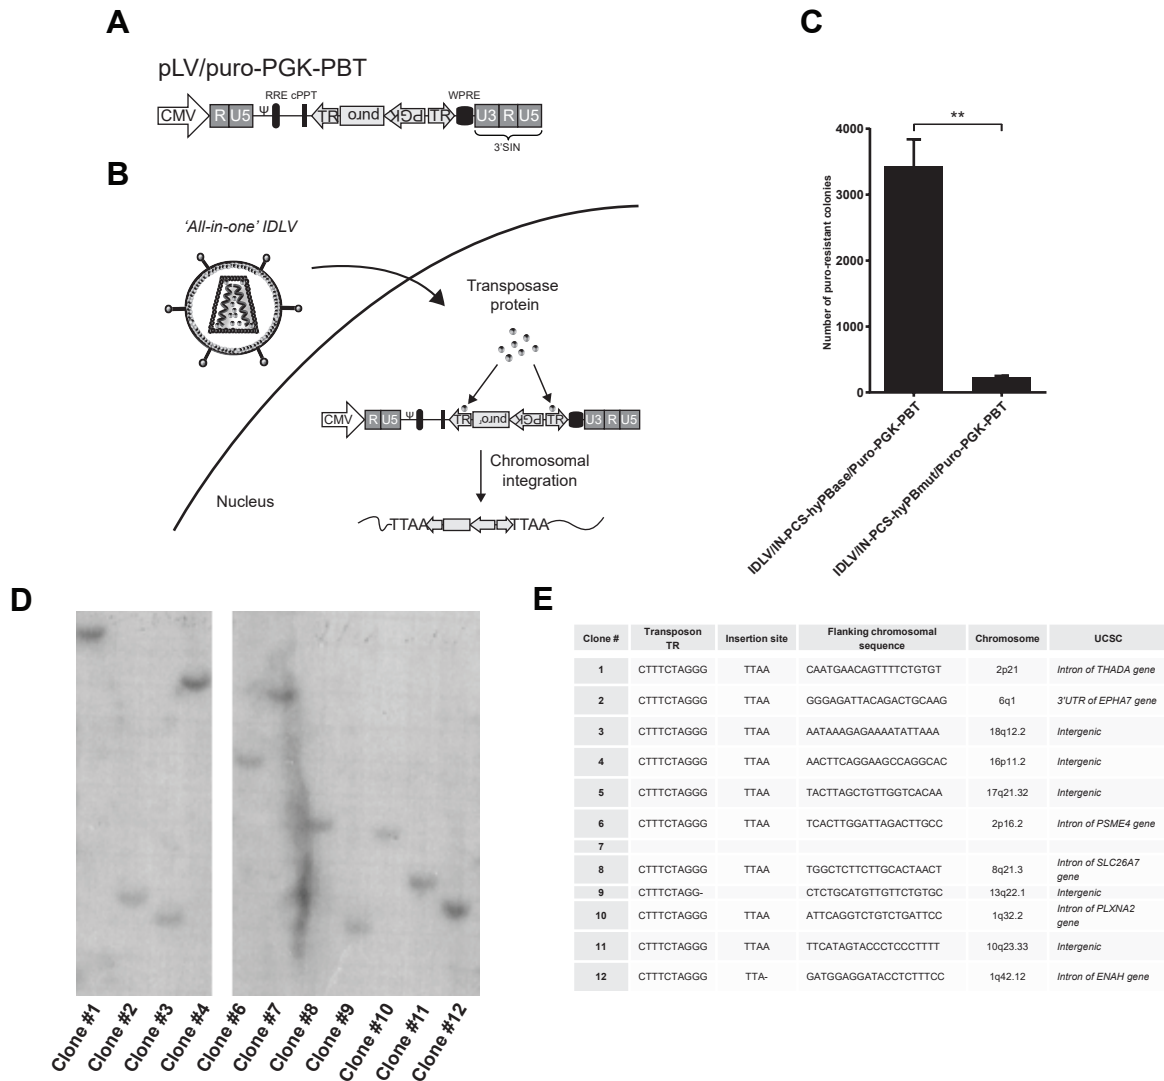

**Figure S1. IDLV-mediated co-delivery of IN-fused hyPBase and a transposon donor facilitates efficient transposition in HeLa cells.** (A) Schematic presentation of the PBT/PGK-Puro transposon carried by a lentiviral transfer construct (B) Basic concept of PB transposition mediated by co-delivery of transposase protein and transposon donor in 'all-in-one' IDLVs. (C) Colony formation by 'all-in-one' IDLVs. HeLa cells were transduced with IDLVs co-packaged with hyPBase protein and a transposon donor incorporating a puromycin selection cassette. The transduced cells were subjected to selection with puromycin. The resulting colonies were fixed, stained and counted. (D) Southern blot of single, isolated clones from the colony-forming assay in (C) demonstrating robust production of single-copy clones by transduction of IDLVs carrying both transposase protein as well as transposon donor. (E) Mapping of integration sites of clones from (D) by long-distance inverse PCR. Data are presented as mean  $\pm$  SEM and  $n \geq 3$ .

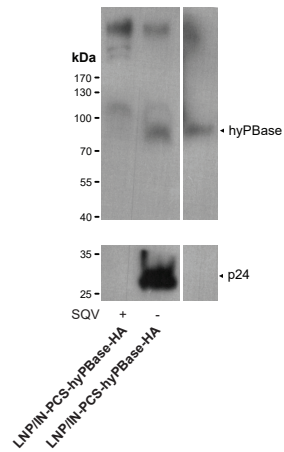

**Figure S2. Protease-dependent release of IN-fused transposase after LNP maturation.** HyPBBase and p24 release from the GagPol polypeptide was evaluated by Western blotting of LNP/IN-hyPBBase-HA lysates produced either with or without the protease inhibitor saquinavir (SQV).

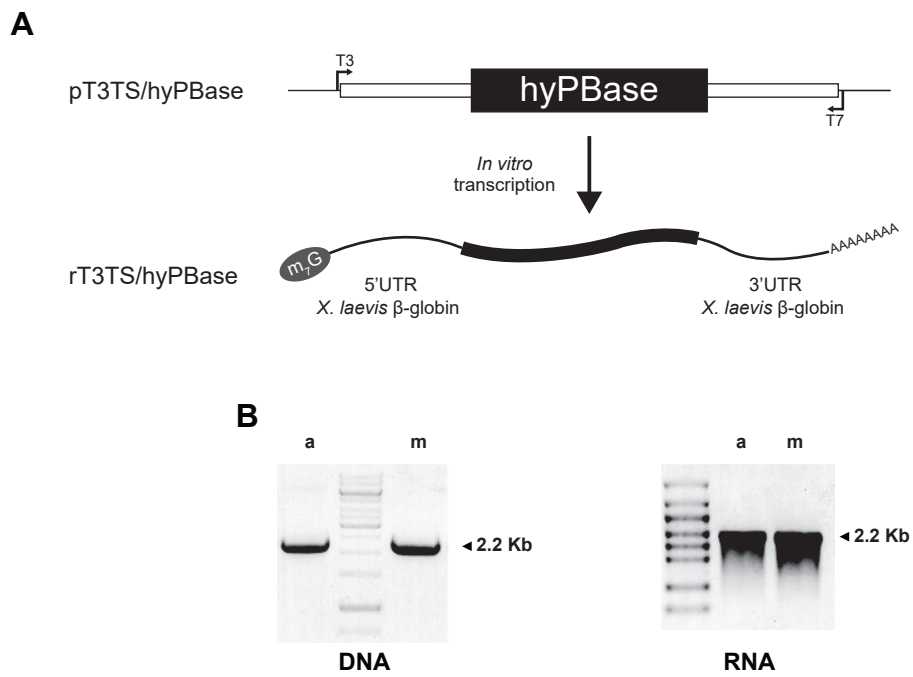

**Figure S3. Production of in vitro-transcribed hyPBase mRNA.** (A) Schematic presentation of the DNA template and mRNA produced by in vitro transcription (B) Representative gels of the PCR amplified hyPBase fragment (left) and the corresponding in vitro-transcribed mRNA (right). a: T3TS/hyPBase, m: T3TS/hyPmut.
